# Supplementary material for: Isomeric ruthenium terpyridine complexes [Ru(trpy)(L)Cl]n+ containing the unsymmetrically bidentate acceptor L = 3-amino-6-(3,5-dimethylpyrazol-1-yl)-1,2,4,5-tetrazine. Synthesis, structures, electrochemistry, spectroscopy and DFT calculations
Source: Royal Society of Chemistry journal article supplement (doi:10.1039/b500152h), 2005-01-01

## Supplementary information

**Table S1** The B3LYP optimised coordinates for [1]<sup>+</sup> and [2]<sup>+</sup>

| [1] <sup>+</sup> |           |           |           |
|------------------|-----------|-----------|-----------|
| C                | 0.325392  | -3.073295 | -0.840570 |
| N                | -0.493616 | -2.070318 | -0.492040 |
| C                | -1.774473 | -2.355603 | -0.107960 |
| C                | -2.226243 | -3.675280 | -0.052897 |
| C                | -1.366449 | -4.713499 | -0.405095 |
| C                | -0.068478 | -4.408587 | -0.810133 |
| Ru               | -0.110457 | 0.002999  | -0.538723 |
| N                | -1.997936 | 0.000155  | 0.052228  |
| C                | -2.625268 | 1.185146  | 0.211774  |
| C                | -3.967989 | 1.207738  | 0.597050  |
| C                | -4.633785 | -0.002955 | 0.790580  |
| C                | -3.968288 | -1.211943 | 0.585739  |
| C                | -2.625541 | -1.186069 | 0.200692  |
| C                | -1.773992 | 2.357329  | -0.086017 |
| N                | -0.493392 | 2.075211  | -0.473267 |
| C                | 0.325842  | 3.080936  | -0.813205 |
| C                | -0.067402 | 4.416045  | -0.770067 |
| C                | -1.364972 | 4.717707  | -0.361275 |
| C                | -2.225109 | 3.676642  | -0.018395 |
| Cl               | -0.979869 | 0.012760  | -2.807438 |
| N                | 2.014323  | 0.007285  | -0.981515 |
| N                | 2.764801  | -0.002684 | 0.182658  |
| C                | 4.121114  | -0.000302 | -0.089658 |
| C                | 4.214368  | 0.011547  | -1.461648 |
| C                | 2.895999  | 0.016015  | -1.985871 |
| C                | 2.072125  | -0.009614 | 1.391429  |
| N                | 0.710485  | -0.006851 | 1.298254  |
| N                | 0.014824  | -0.012490 | 2.426419  |
| C                | 0.722886  | -0.020849 | 3.577630  |
| N                | 2.077246  | -0.024441 | 3.669141  |
| N                | 2.744006  | -0.018396 | 2.532847  |
| C                | 2.497624  | 0.027479  | -3.426265 |
| C                | 5.207316  | -0.009196 | 0.935912  |
| N                | 0.032708  | -0.026311 | 4.733777  |
| H                | 1.412756  | 0.047021  | -3.540533 |
| H                | -0.975291 | -0.024300 | 4.727792  |
| H                | 2.927498  | 0.901699  | -3.929302 |
| H                | 2.893281  | -0.860087 | -3.934333 |
| H                | 5.130732  | 0.016481  | -2.034376 |
| H                | 6.171608  | -0.005952 | 0.421812  |
| H                | 5.154358  | 0.863571  | 1.593697  |
| H                | 5.152864  | -0.892115 | 1.579872  |
| H                | 0.536277  | -0.032899 | 5.608221  |
| H                | 1.319298  | 2.789843  | -1.134822 |
| H                | 0.631783  | 5.193728  | -1.057409 |
| H                | -1.708059 | 5.746447  | -0.316662 |
| H                | -3.242502 | 3.890394  | 0.288416  |
| H                | -4.493224 | 2.145980  | 0.731893  |
| H                | -5.677932 | -0.004198 | 1.085937  |
| H                | -4.493778 | -2.151259 | 0.711794  |
| H                | -3.243888 | -3.891360 | 0.251423  |
| H                | -1.710062 | -5.742445 | -0.370406 |
| H                | 0.630585  | -5.183853 | -1.104219 |

H 1.319390 -2.780039 -1.158536

[2]<sup>+</sup>

|    |           |           |           |
|----|-----------|-----------|-----------|
| N  | -4.014189 | -0.000032 | 0.357669  |
| C  | -2.690065 | -0.000018 | 0.393727  |
| N  | -1.881053 | 0.000045  | -0.706917 |
| N  | -2.463945 | 0.000122  | -1.889120 |
| C  | -3.817962 | 0.000127  | -1.907381 |
| N  | -4.620859 | 0.000036  | -0.811150 |
| N  | -2.034734 | -0.000077 | 1.626603  |
| N  | -0.655906 | -0.000053 | 1.603448  |
| C  | -0.265615 | -0.000098 | 2.880085  |
| C  | -1.399272 | -0.000154 | 3.725060  |
| C  | -2.518617 | -0.000138 | 2.920312  |
| Ru | 0.146666  | 0.000015  | -0.368976 |
| Cl | 0.745527  | 0.000080  | -2.705204 |
| C  | 1.175252  | -0.000089 | 3.283625  |
| C  | -3.962642 | -0.000177 | 3.302316  |
| N  | -4.410100 | 0.000233  | -3.113097 |
| N  | 0.554667  | -2.067183 | -0.335474 |
| C  | -0.302283 | -3.077139 | -0.551026 |
| C  | 0.091264  | -4.412352 | -0.557419 |
| C  | 1.432828  | -4.716358 | -0.335247 |
| C  | 2.331785  | -3.674013 | -0.123481 |
| C  | 1.876629  | -2.354075 | -0.134131 |
| C  | 2.761602  | -1.184551 | 0.041104  |
| N  | 2.112275  | -0.000008 | -0.000079 |
| C  | 2.761615  | 1.184526  | 0.041171  |
| C  | 4.148752  | 1.208962  | 0.208052  |
| C  | 4.838183  | -0.000032 | 0.301810  |
| C  | 4.148738  | -1.209013 | 0.207983  |
| C  | 1.876657  | 2.354071  | -0.133995 |
| N  | 0.554690  | 2.067205  | -0.335351 |
| C  | -0.302248 | 3.077183  | -0.550842 |
| C  | 0.091314  | 4.412393  | -0.557157 |
| C  | 1.432882  | 4.716370  | -0.334970 |
| C  | 2.331828  | 3.674002  | -0.123268 |
| H  | -4.487302 | 0.877953  | 2.914009  |
| H  | -3.845780 | 0.000232  | -3.950345 |
| H  | -4.034353 | -0.000237 | 4.392776  |
| H  | -4.487280 | -0.878276 | 2.913913  |
| H  | -1.396299 | -0.000200 | 4.805527  |
| H  | 1.696981  | -0.884811 | 2.904109  |
| H  | 1.257212  | -0.000131 | 4.373227  |
| H  | 1.696949  | 0.884682  | 2.904180  |
| H  | -5.417324 | 0.000173  | -3.174808 |
| H  | -1.332246 | 2.795098  | -0.734371 |
| H  | -0.643700 | 5.188872  | -0.739092 |
| H  | 1.777641  | 5.745421  | -0.333431 |
| H  | 3.382184  | 3.886085  | 0.039933  |
| H  | 4.688404  | 2.147853  | 0.247233  |
| H  | 5.915900  | -0.000042 | 0.427753  |
| H  | 4.688379  | -2.147912 | 0.247111  |
| H  | 3.382139  | -3.886117 | 0.039709  |
| H  | 1.777576  | -5.745412 | -0.333768 |
| H  | -0.643758 | -5.188812 | -0.739401 |
| H  | -1.332277 | -2.795031 | -0.734540 |

**Table S2** Singlet excited states of  $[1]^+$  computed at the TD-DFT /B3LYP// B3LYP/ LanL2DZ level\* (geometry optimised)

| State | Energy<br>( $\times 10^3 \text{ cm}^{-1}$ ) | Oscillator<br>strength | $\Psi_O - \Psi_V^a$                  | Type of transitions                                                                        |
|-------|---------------------------------------------|------------------------|--------------------------------------|--------------------------------------------------------------------------------------------|
| 1     | 13.74                                       | 0.0001                 | HOMO-1 ----> LUMO (0.68)             | $\text{Ru}_{\text{dxz}}, \text{Cl} \text{ ----> } \pi^* (\text{N}_t)$                      |
| 2     | 14.88                                       | 0.0066                 | HOMO-2 ----> LUMO (0.56)             | $\text{Ru}_{\text{dxy}} \text{ ----> } \pi^* (\text{N}_t)$                                 |
|       |                                             |                        | HOMO ----> LUMO (0.38)               | $\text{Ru}_{\text{dxz}}, \text{Cl} \text{ ----> } \pi^* (\text{N}_t)$                      |
| 3     | 18.52                                       | 0.0058                 | HOMO-2 ----> LUMO+1 (0.13)           | $\text{Ru}_{\text{dxy}} \text{ ----> } \pi^* (\text{trpy})$                                |
|       |                                             |                        | HOMO ----> LUMO+1 (0.68)             | $\text{Ru}_{\text{dxz}}, \text{Cl} \text{ ----> } \pi (\text{trpy})$                       |
| 4     | <b>19.00</b>                                | <b>0.1282</b>          | <b>HOMO ----&gt; LUMO (0.39)</b>     | <b><math>\text{Ru}_{\text{dxz}}, \text{Cl} \text{ ----&gt; } \pi^* (\text{N}_t)</math></b> |
| 5     | 19.92                                       | 0.0319                 | HOMO-1 ----> LUMO+1 (0.45)           | $\text{Ru}_{\text{dxz}}, \text{Cl} \text{ ----> } \pi^* (\text{trpy})$                     |
|       |                                             |                        | HOMO ----> LUMO (0.26)               | $\text{Ru}_{\text{dxz}}, \text{Cl} \text{ ----> } \pi^* (\text{N}_t)$                      |
|       |                                             |                        | HOMO ----> LUMO+2 (0.38)             | $\text{Ru}_{\text{dxz}}, \text{Cl} \text{ ----> } \pi^* (\text{trpy})$                     |
| 6     | 20.68                                       | 0.000                  | HOMO-2 ----> LUMO+1 (0.66)           | $\text{Ru}_{\text{dxy}} \text{ ----> } \pi^* (\text{trpy})$                                |
| 7     | <b>20.85</b>                                | <b>0.0169</b>          | <b>HOMO-2 ----&gt; LUMO+1 (0.16)</b> | <b><math>\text{Ru}_{\text{dxy}} \text{ ----&gt; } \pi^* (\text{trpy})</math></b>           |
|       |                                             |                        | HOMO-1 ----> LUMO+2 (0.67)           | $\text{Ru}_{\text{dxz}}, \text{Cl} \text{ ----> } \pi^* (\text{trpy})$                     |
| 8     | 21.20                                       | 0.0016                 | HOMO-6 ----> LUMO+1 (0.59)           | $n_n(\text{N}_t) \text{ ----> } \pi^* (\text{trpy})$                                       |
| 9     | 21.52                                       | 0.0163                 | HOMO-2 ----> LUMO (0.10)             | $\text{Ru}_{\text{dxy}} \text{ ----> } \pi^* (\text{N}_t)$                                 |
|       |                                             |                        | HOMO-2 ----> LUMO+2 (0.15)           | $\text{Ru}_{\text{dxy}} \text{ ----> } \pi^* (\text{trpy})$                                |
|       |                                             |                        | HOMO ----> LUMO+2 (0.56)             | $\text{Ru}_{\text{dxz}}, \text{Cl} \text{ ----> } \pi^* (\text{trpy})$                     |
| 10    | 23.15                                       | 0.0036                 | HOMO-2 ----> LUMO+2 (0.67)           | $\text{Ru}_{\text{dxy}} \text{ ----> } \pi^* (\text{trpy})$                                |

\*Los Alamos effective core potential for the Ru core electrons with DZ functions for the valence orbitals and a 6-31G\* basis set for all other elements.

<sup>a</sup> $\Psi_O$  and  $\Psi_V$  are the occupied and virtual orbitals respectively, that define the transition. trpy – terpyridine,  $\text{N}_t$  – tetrazine,  $\text{N}_p$  – pyrazol,  $n_n$  –  $\sigma$ –type lone pair orbital.

**Table S3** Singlet excited states of [2]<sup>+</sup> computed at the TD-DFT/B3LYP// B3LYP/LanL2DZ level\* (geometry optimised)

| State | Energy<br>( $\times 10^3 \text{ cm}^{-1}$ ) | Oscillator<br>strength | $\Psi_{\text{O}}-\Psi_{\text{V}}$ <sup>a</sup> | Type of transitions                                                         |
|-------|---------------------------------------------|------------------------|------------------------------------------------|-----------------------------------------------------------------------------|
| 1     | 11.55                                       | 0.0001                 | HOMO -----> LUMO (0.69)                        | Ru <sub>dyz</sub> , Cl -----> $\pi^*$ (N <sub>t</sub> )                     |
| 2     | 12.92                                       | 0                      | HOMO-1 -----> LUMO (0.69)                      | Ru <sub>dxz</sub> , Cl -----> $\pi^*$ (N <sub>t</sub> )                     |
| 3     | <b>15.97</b>                                | <b>0.0087</b>          | <b>HOMO -----&gt; LUMO+1 (0.69)</b>            | <b>Ru<sub>dyz</sub>, Cl -----&gt; <math>\pi^*</math> (trpy)</b>             |
| 4     | 17.99                                       | 0.0014                 | HOMO -----> LUMO+2(0.51)                       | Ru <sub>dyz</sub> , Cl -----> $\pi^*$ (trpy)                                |
| 5     | <b>19.24</b>                                | <b>0.0661</b>          | <b>HOMO-2 -----&gt; LUMO (0.15)</b>            | <b>Ru<sub>dxz</sub> -----&gt; <math>\pi^*</math> (N<sub>t</sub>)</b>        |
|       |                                             |                        | HOMO-1 -----> LUMO+1(0.46)                     | Ru <sub>dxz</sub> , Cl -----> $\pi^*$ (trpy)                                |
|       |                                             |                        | HOMO -----> LUMO+2 (0.47)                      | Ru <sub>dyz</sub> , Cl -----> $\pi^*$ (trpy)                                |
| 6     | 19.68                                       | 0.0143                 | HOMO-1 -----> LUMO+2(0.70)                     | Ru <sub>dxz</sub> , Cl -----> $\pi^*$ (trpy)                                |
| 7     | 20.84                                       | 0.0022                 | HOMO-6 -----> LUMO(0.63)                       | n <sub>n</sub> (N <sub>t</sub> ) -----> $\pi^*$ (N <sub>t</sub> )           |
| 8     | 21.74                                       | 0.0003                 | HOMO-2 -----> LUMO (0.68)                      | Ru <sub>dxz</sub> -----> $\pi^*$ (N <sub>t</sub> )                          |
| 9     | 21.75                                       | 0.0936                 | HOMO-3 -----> LUMO (0.20)                      | Ru <sub>dyz</sub> , Cl -----> $\pi^*$ (N <sub>t</sub> )                     |
|       |                                             |                        | HOMO-2 -----> LUMO+1 (0.55)                    | Ru <sub>dxz</sub> -----> $\pi^*$ (trpy)                                     |
| 10    | 22.74                                       | 0.0101                 | HOMO-3 -----> LUMO(0.64)                       | Ru <sub>dyz</sub> , Cl -----> , $\pi^*$ (N <sub>t</sub> )                   |
|       |                                             |                        | HOMO -----> LUMO+3 (0.20)                      | Ru <sub>dyz</sub> , Cl -----> $\pi^*$ (trpy),<br>$\pi^*$ ( N <sub>t</sub> ) |

\*Los Alamos effective core potential for the Ru core electrons with DZ functions for the valence orbitals and a 6-31G\* basis set for all other elements.

<sup>a</sup> $\Psi_{\text{O}}$  and  $\Psi_{\text{V}}$  are the occupied and virtual orbitals respectively, that define the transition. trpy – terpyridine, N<sub>t</sub> – tetrazine, N<sub>p</sub> – pyrazol, n<sub>n</sub> – $\sigma$ -type lone pair orbital.

**Table S4** Singlet excited states of  $[1]^+$  computed at the TD-DFT/B3LYP level for X-ray structure\*

| State    | Energy<br>( $\times 10^3 \text{ cm}^{-1}$ ) | Oscillator<br>strength | $\Psi_O - \Psi_V^a$                  | Type of transitions                                                     |
|----------|---------------------------------------------|------------------------|--------------------------------------|-------------------------------------------------------------------------|
| 1        | 13.21                                       | 0.0001                 | HOMO ----> LUMO (0.65)               | Ru <sub>dyz</sub> , Cl ----> $\pi^*$ (N <sub>t</sub> )                  |
| 2        | 14.81                                       | 0.0068                 | HOMO-2 ----> LUMO+1 (0.55)           | Ru <sub>dxz</sub> ----> $\pi^*$ (trpy)                                  |
|          |                                             |                        | HOMO-1 ----> LUMO+1 (0.37)           | Ru <sub>dxz</sub> , Cl ----> $\pi^*$ (trpy)                             |
| 3        | 18.48                                       | 0.0049                 | HOMO-2 ----> LUMO+1 (0.13)           | Ru <sub>dxz</sub> ----> $\pi^*$ (trpy)                                  |
|          |                                             |                        | HOMO-1 ----> LUMO+1 (0.64)           | Ru <sub>dxz</sub> , Cl ----> $\pi^*$ (trpy)                             |
|          |                                             |                        | HOMO ----> LUMO+1 (0.22)             | Ru <sub>dyz</sub> , Cl ----> $\pi^*$ (trpy)                             |
| 4        | 18.92                                       | 0.0621                 | HOMO-2 ----> LUMO (0.22)             | Ru <sub>dxz</sub> ----> $\pi^*$ (N <sub>t</sub> )                       |
|          |                                             |                        | HOMO ----> LUMO+1 (0.57)             | Ru <sub>dyz</sub> , Cl ----> $\pi^*$ (trpy)                             |
| <b>5</b> | <b>20.03</b>                                | <b>0.0836</b>          | <b>HOMO-1 ----&gt; LUMO (0.38)</b>   | <b>Ru<sub>dxz</sub>, Cl ----&gt; <math>\pi^*</math> (N<sub>t</sub>)</b> |
|          |                                             |                        | <b>HOMO ----&gt; LUMO (0.10)</b>     | <b>Ru<sub>dyz</sub>, Cl ----&gt; <math>\pi^*</math> (N<sub>t</sub>)</b> |
|          |                                             |                        | <b>HOMO --&gt; LUMO+1 (0.28)</b>     | <b>Ru<sub>dyz</sub>, Cl ----&gt; <math>\pi^*</math> (trpy)</b>          |
| 6        | 20.43                                       | 0.0126                 | HOMO ----> LUMO+2 (0.68)             | Ru <sub>dyz</sub> , Cl ----> $\pi^*$ (trpy)                             |
| 7        | 20.98                                       | 0.0021                 | HOMO-2 ----> LUMO+1 (0.67)           | Ru <sub>dxz</sub> ----> $\pi^*$ (trpy)                                  |
| <b>8</b> | <b>21.14</b>                                | <b>0.0128</b>          | <b>HOMO-2 ----&gt; LUMO+2 (0.12)</b> | <b>Ru<sub>dxz</sub> ----&gt; <math>\pi^*</math> (trpy)</b>              |
|          |                                             |                        | <b>HOMO-1 ----&gt; LUMO+2 (0.62)</b> | <b>Ru<sub>dxz</sub>, Cl ----&gt; <math>\pi^*</math> (trpy)</b>          |
|          |                                             |                        | HOMO ----> LUMO+1 (0.20)             | Ru <sub>dyz</sub> , Cl ----> $\pi^*$ (trpy)                             |
| 9        | 21.58                                       | 0.0012                 | HOMO-5 ----> LUMO (0.12)             | Ru <sub>dxz</sub> , Cl ----> $\pi^*$ (N <sub>t</sub> )                  |
|          |                                             |                        | HOMO-4 ----> LUMO (0.59)             | n <sub>n</sub> (N <sub>t</sub> ) ----> $\pi^*$ (N <sub>t</sub> )        |
| 10       | 23.48                                       | 0.0063                 | HOMO-2 ----> LUMO+2 (0.68)           | Ru <sub>dxz</sub> ----> $\pi^*$ (trpy)                                  |

\*Los Alamos effective core potential for the Ru core electrons with DZ functions for the valence orbitals and a 6-31G\* basis set for all other elements.

<sup>a</sup> $\Psi_O$  and  $\Psi_V$  are the occupied and virtual orbitals respectively, that define the transition. trpy – terpyridine, N<sub>t</sub> – tetrazine, N<sub>p</sub> – pyrazol, n<sub>n</sub> – $\sigma$ -type lone pair orbital.

**Table S5** Singlet excited states of [2]<sup>+</sup> computed at the TD-DFT/B3LYP level for X-ray structure\*

| State    | Energy<br>( $\times 10^3 \text{ cm}^{-1}$ ) | Oscillator<br>strength | $\Psi_O - \Psi_V^a$                 | Type of transitions                                                                  |
|----------|---------------------------------------------|------------------------|-------------------------------------|--------------------------------------------------------------------------------------|
| 1        | 10.53                                       | 0.0006                 | HOMO ----> LUMO (0.69)              | Ru <sub>dyz</sub> , Cl ----> $\pi^*$ (N <sub>t</sub> )                               |
| 2        | 12.58                                       | 0.0022                 | HOMO-1 ----> LUMO (0.68)            | Ru <sub>dxz</sub> , Cl ----> $\pi^*$ (N <sub>t</sub> )                               |
| <b>3</b> | <b>15.35</b>                                | <b>0.0114</b>          | <b>HOMO ----&gt; LUMO+1 (0.69)</b>  | <b>Ru<sub>dyz</sub>, Cl ----&gt; <math>\pi^*</math> (trpy)</b>                       |
| 4        | 17.60                                       | 0.0008                 | HOMO-1 ----> LUMO+1 (0.45)          | Ru <sub>dxz</sub> , Cl ----> $\pi^*$ (trpy)                                          |
|          |                                             |                        | HOMO ----> LUMO+2 (0.53)            | Ru <sub>dyz</sub> , Cl ----> $\pi^*$ (trpy)                                          |
| <b>5</b> | <b>19.03</b>                                | <b>0.0545</b>          | <b>HOMO-2 ----&gt; LUMO (0.12)</b>  | <b>Ru<sub>dxz</sub>, Cl ----&gt; <math>\pi^*</math> (N<sub>t</sub>)</b>              |
|          |                                             |                        | <b>HOMO-1 ----&gt; LUMO+1(0.49)</b> | <b>Ru<sub>dxz</sub>, Cl ----&gt; <math>\pi^*</math> (trpy)</b>                       |
| 6        | 19.72                                       | 0.0126                 | HOMO-1 ----> LUMO+2 (0.69)          | Ru <sub>dxz</sub> , Cl ----> $\pi^*$ (trpy)                                          |
| 7        | 21.33                                       | 0.013                  | HOMO-6 ----> LUMO (0.53)            | n <sub>n</sub> (N <sub>t</sub> ) ----> $\pi^*$ (N <sub>t</sub> )                     |
| 8        | 22.09                                       | 0.0576                 | HOMO-6 ----> LUMO+1 (0.27)          | n <sub>n</sub> (N <sub>t</sub> ) ----> $\pi^*$ (trpy)                                |
|          |                                             |                        | HOMO-3 ----> LUMO (0.22)            | Ru <sub>dyz</sub> , Cl ----> $\pi^*$ (N <sub>t</sub> )                               |
|          |                                             |                        | HOMO-2 ----> LUMO (0.42)            | Ru <sub>dxz</sub> ----> $\pi^*$ (N <sub>t</sub> )                                    |
|          |                                             |                        | HOMO-2 ----> LUMO+1 (0.12)          | Ru <sub>dxz</sub> ----> $\pi^*$ (trpy)                                               |
| 9        | 22.21                                       | 0.0012                 | HOMO-4 ----> LUMO (0.12)            | Ru <sub>dyz</sub> , Cl ----> $\pi^*$ (N <sub>t</sub> )                               |
|          |                                             |                        | HOMO-2 ----> LUMO+1 (0.53)          | Ru <sub>dxz</sub> ----> $\pi^*$ (trpy)                                               |
| 10       | 22.33                                       | 0.0223                 | HOMO-3 ----> LUMO (0.54)            | Ru <sub>dyz</sub> , Cl ----> $\pi^*$ (N <sub>t</sub> )                               |
|          |                                             |                        | HOMO-2 ----> LUMO (0.17)            | Ru <sub>dxz</sub> ----> $\pi^*$ (N <sub>t</sub> )                                    |
|          |                                             |                        | HOMO ----> LUMO+3 (0.25)            | Ru <sub>dyz</sub> , Cl ----> $\pi^*$ (N <sub>t</sub> ),<br>$\pi^*$ (N <sub>p</sub> ) |

\*Los Alamos effective core potential for the Ru core electrons with DZ functions for the valence orbitals and a 6-31G\* basis set for all other elements.

<sup>a</sup> $\Psi_O$  and  $\Psi_V$  are the occupied and virtual orbitals respectively, that define the transition. trpy – terpyridine, N<sub>t</sub> – tetrazine, N<sub>p</sub> – pyrazol, n<sub>n</sub> – $\sigma$ -type lone pair orbital.

**Table S6** Calculated energies of frontier molecular orbitals computed at the B3LYP level

| MO No.      | $[1]^+$ |                  | $[2]^+$ |                  |
|-------------|---------|------------------|---------|------------------|
|             | eV      | $\text{cm}^{-1}$ | eV      | $\text{cm}^{-1}$ |
| HOMO-4      | -9.3909 | -75743           | -9.2682 | -74754           |
| HOMO-3      | -9.1360 | -73687           | -9.1104 | -73481           |
| HOMO-2      | -8.485  | -68437           | -8.5950 | -69324           |
| HOMO-1      | -8.1808 | -65983           | -8.0165 | -64658           |
| <b>HOMO</b> | -8.1550 | -65775           | -7.8489 | -63306           |
| <b>LUMO</b> | -5.5870 | -45063           | -5.5313 | -44613           |
| LUMO+1      | -4.9914 | -40259           | -4.9829 | -40191           |
| LUMO+2      | -4.8523 | -39137           | -4.8393 | -39032           |
| LUMO+3      | -4.0733 | -32853           | -4.1579 | -33536           |
| LUMO+4      | -3.8656 | -31178           | -3.8463 | -31023           |

$$[1]^+ \text{ HOMO} - \text{LUMO} = 20712 \text{ cm}^{-1}$$

$$[2]^+ \text{ HOMO} - \text{LUMO} = 18693 \text{ cm}^{-1}$$

**Table S7** Delocalisation energy of back-bonding ( $d\pi$  to  $\pi^*$ ) in  $[1]^+$  computed at the NBO/B3LYP//B3LYP/LanL2DZ<sup>a</sup>

| Donor<br>$d\pi$ | Acceptor <sup>b</sup><br>$\pi^*$ | Occupancy of $\pi^*$ | Delocalisation<br>energy kcal/mole |
|-----------------|----------------------------------|----------------------|------------------------------------|
| Ru              | N3–N4                            | 0.6449               | 22.59                              |
| Ru              | N8–C8                            | 0.4236               | 5.50                               |
| Ru              | N9–C17                           | 0.5159               | 9.31                               |
| Ru              | N1–C2                            | 0.4257               | 0.67                               |
| Ru              | N10–C22                          | 0.5220               | 5.17                               |

<sup>a</sup>Los Alamos effective core potential for the Ru core electrons with DZ functions for the valence orbitals with f-polarization and a 6-31G\* basis set for all other elements.

<sup>b</sup>Refer to X-ray structure[Fig. 1a] for atom numbers.



**Table S8** Delocalisation energy of back-bonding ( $d\pi$  to  $\pi^*$ ) in  $[2]^+$  computed at the NBO/B3LYP//B3LYP/LanL2DZ\*<sup>a</sup>

| Donor<br>$d\pi$ | Acceptor <sup>b</sup><br>$\pi^*$ | Occupancy of $\pi^*$ | Delocalisation<br>energy kcal/mole |
|-----------------|----------------------------------|----------------------|------------------------------------|
| Ru              | N3–C6                            | 0.5593               | 10.69                              |
| Ru              | N8–C8                            | 0.4287               | 4.91                               |
| Ru              | N9–C17                           | 0.5219               | 9.08                               |
| Ru              | N1–C2                            | 0.4465               | 3.68                               |
| Ru              | N10–C22                          | 0.4287               | 4.91                               |

<sup>a</sup>Los Alamos effective core potential for the Ru core electrons with DZ functions for the valence orbitals with f-polarization and a 6–31G\* basis set for all other elements.

<sup>b</sup>Refer to X-ray structure [Fig. 1b] for atom numbers.

**Table S9** Total energies of complex [1]<sup>+</sup> and [2]<sup>+</sup>

| Complex          | Energy/a.u.   | Difference, kcal/mol<br>(cm <sup>-1</sup> ) |
|------------------|---------------|---------------------------------------------|
| [1] <sup>+</sup> | -1951.8711444 | 0.00                                        |
| [2] <sup>+</sup> | -1951.8621541 | 5.64 (1973)                                 |

**Fig. S1** Orbital contours diagrams of the frontier Kohn–Sham orbitals of  $[1]^+$

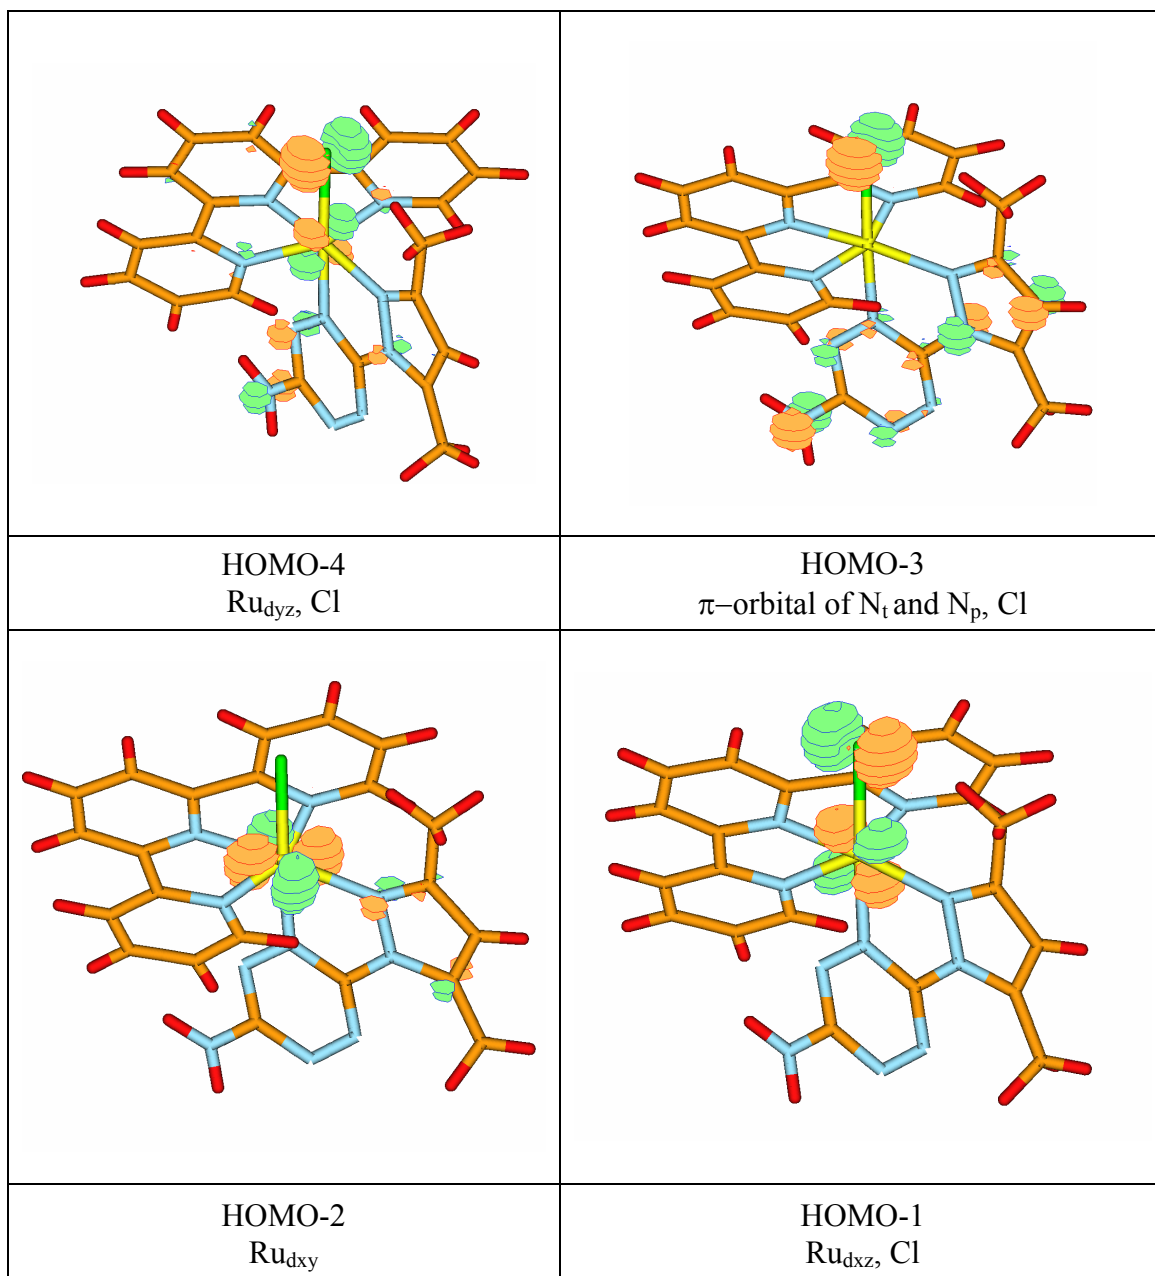

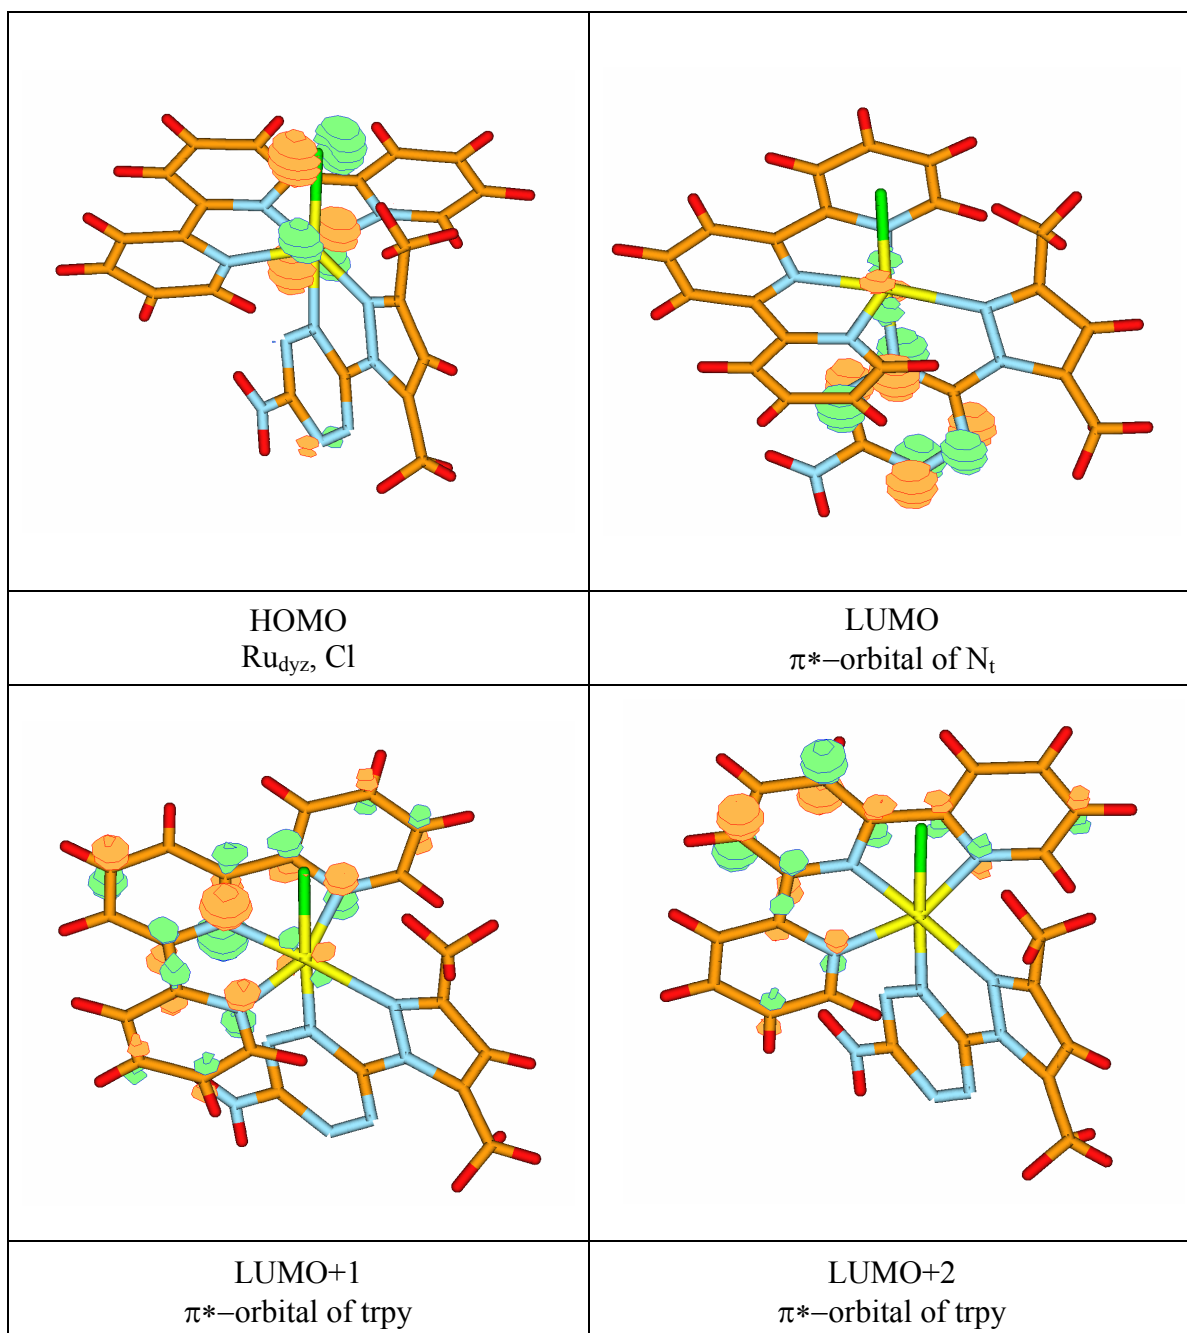

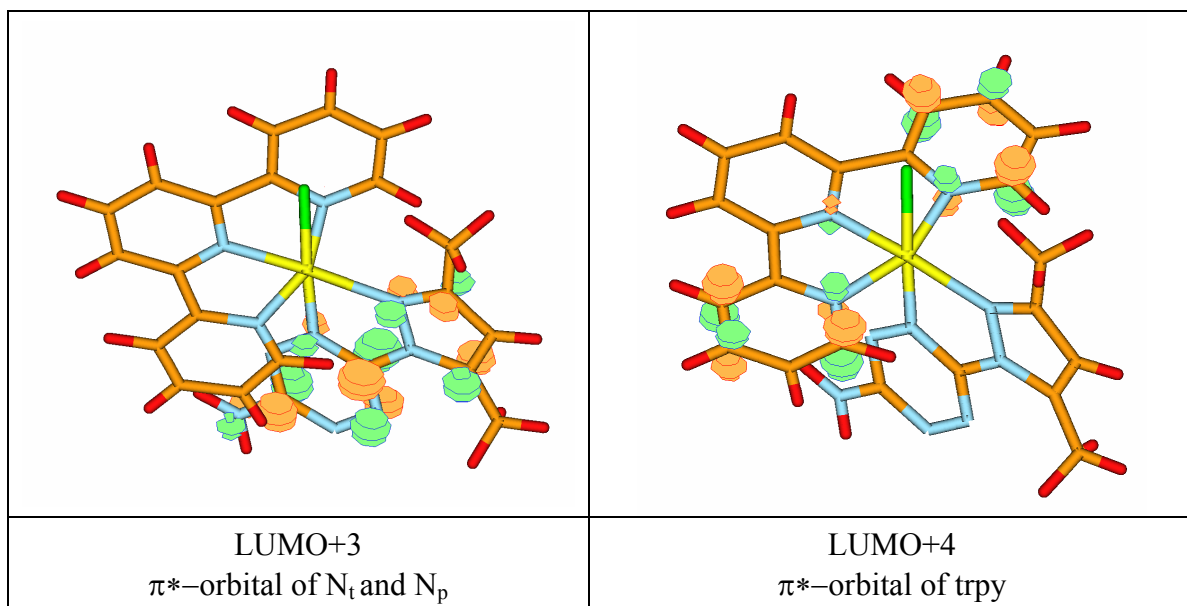

**Fig. S2** Orbital contours diagrams of the frontier Kohn–Sham orbitals of  $[2]^+$

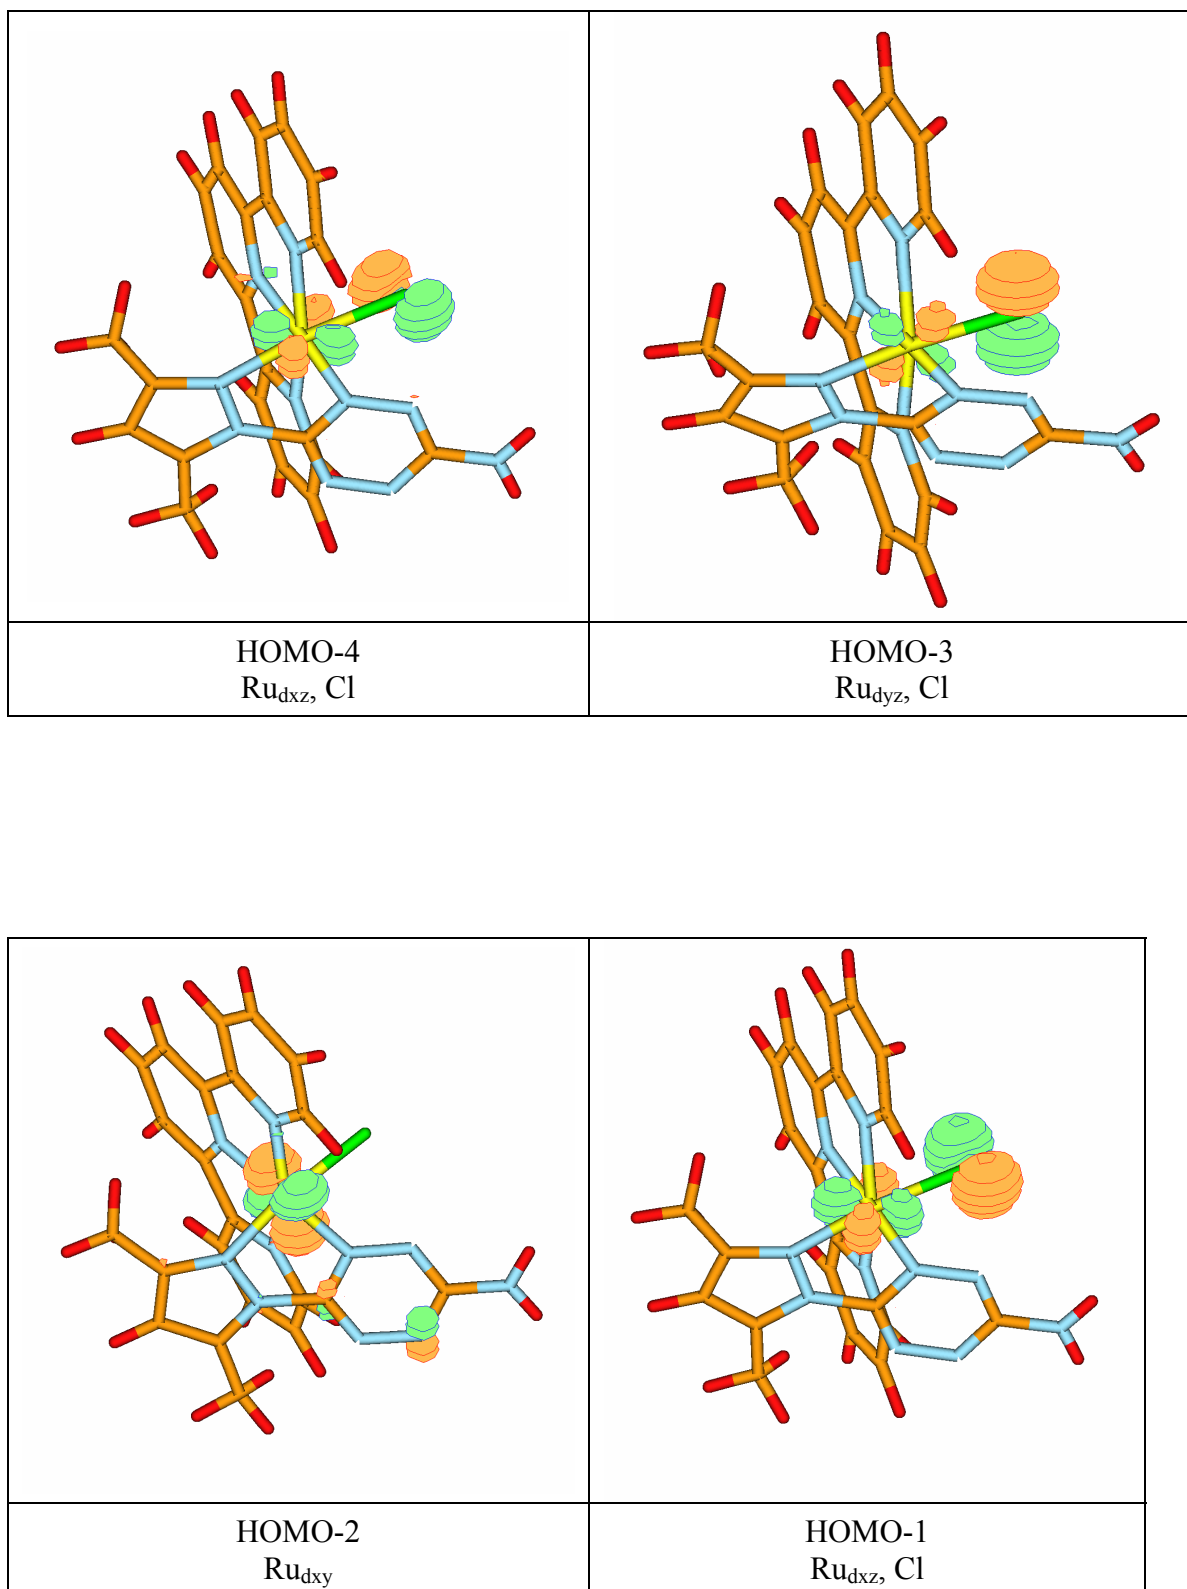

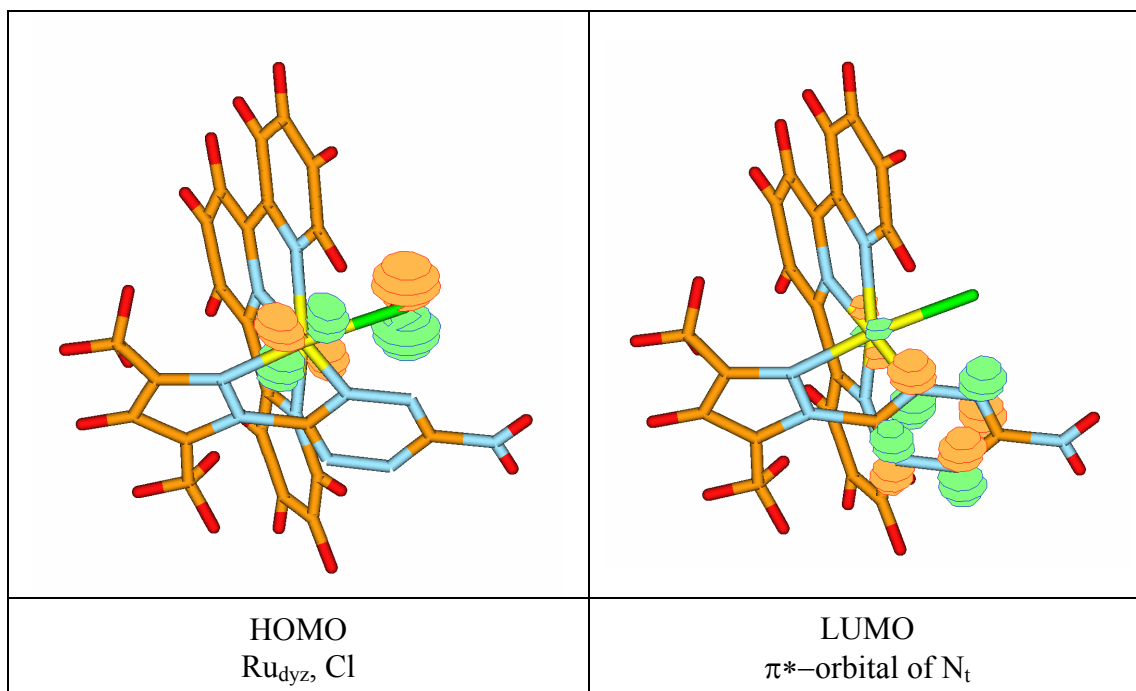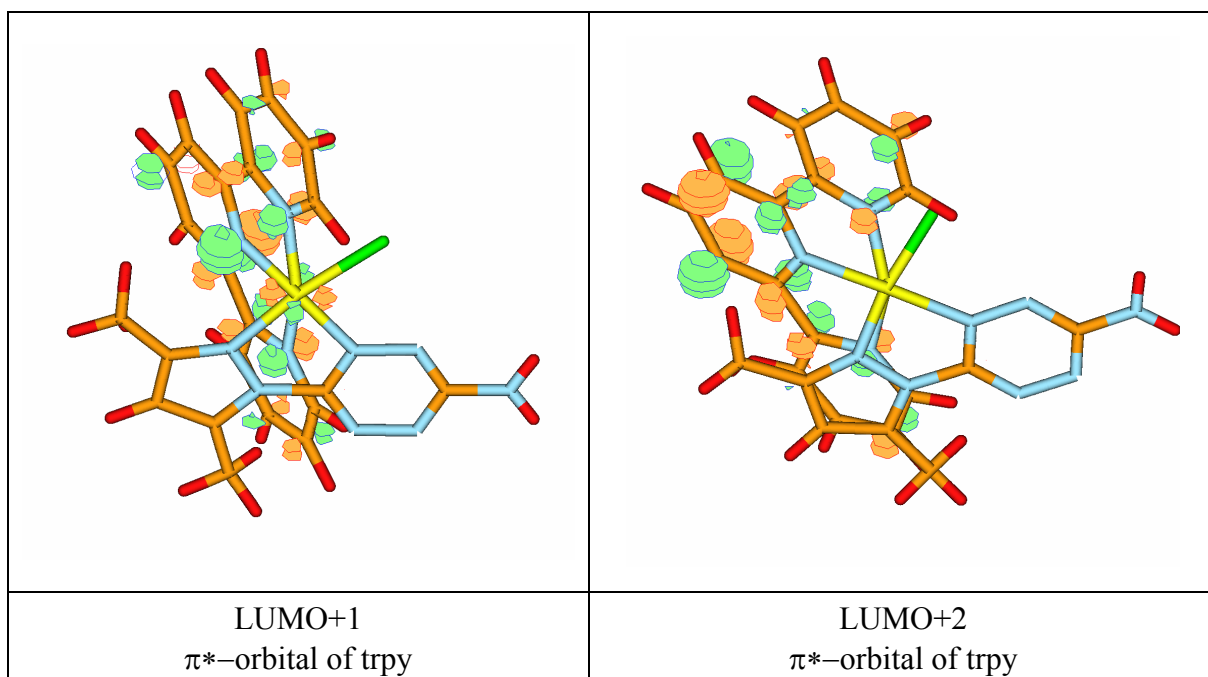

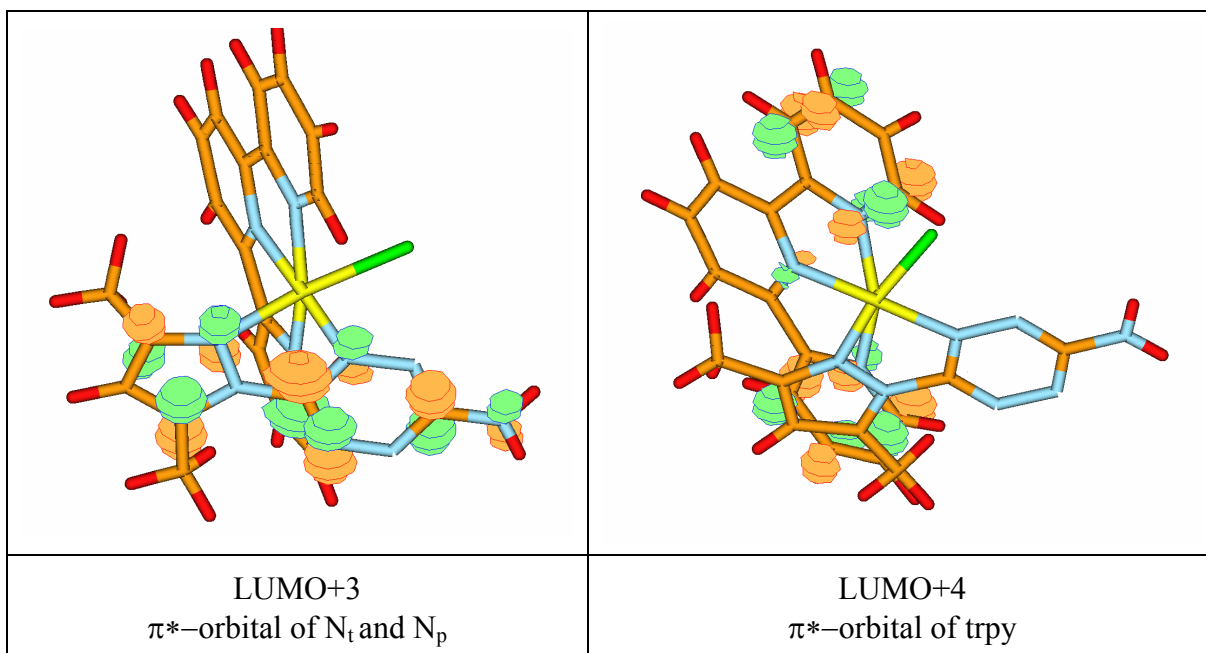

Supplement: b500152h.pdf [file b500152h.pdf]
